# Supplementary material for: Comprehensive analysis of ZNF family genes in prognosis, immunity, and treatment of esophageal cancer
Source: Springer Nature journal article supplement (doi:10.1186/s12885-023-10779-5), 2023-04-03

risk low high

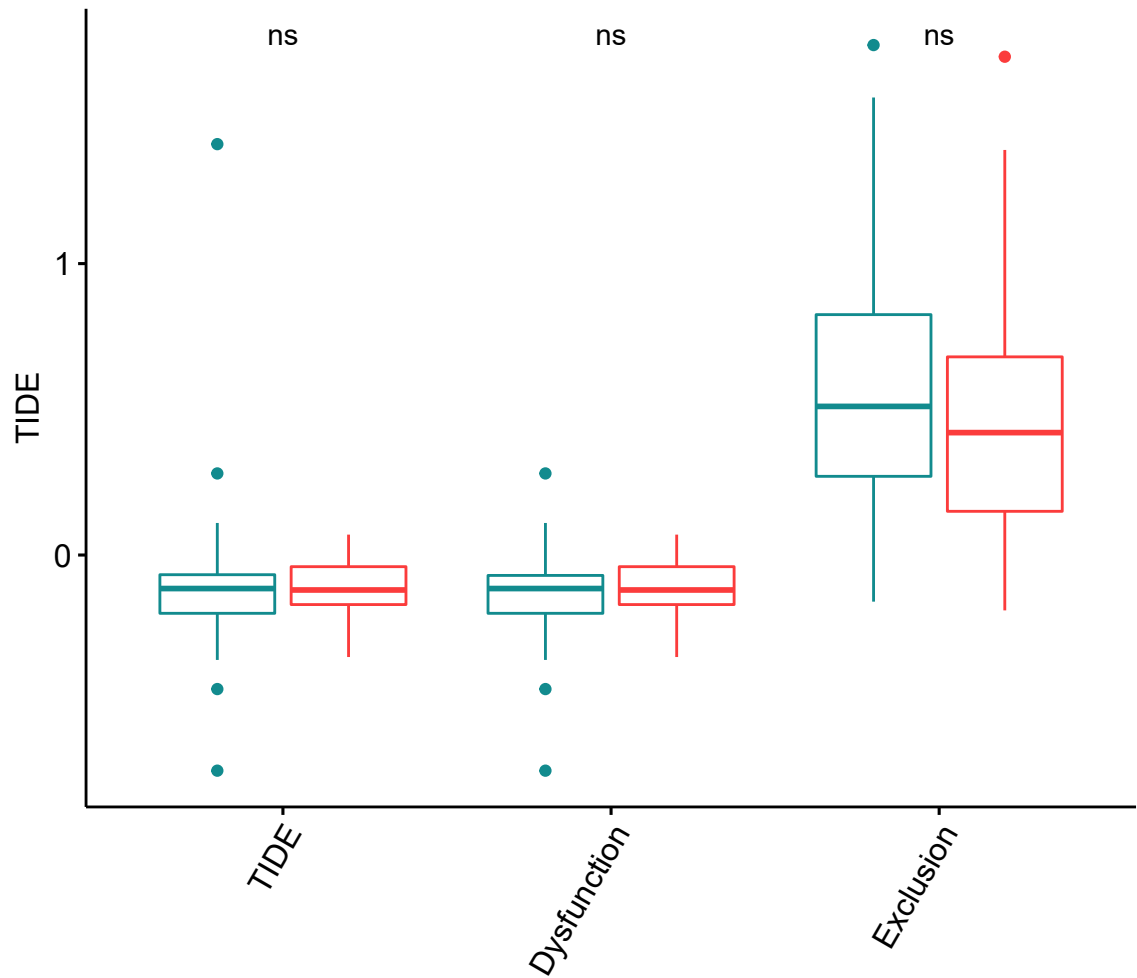

Supplement: MOESM5 [file 25202868]
